# Supplementary material
Source: publisher figshare collection journal article supplement (https://acs.figshare.com/ndownloader/files/4075528)
Supplement: Supplementary file 1 [file 4075528]

## Supporting Information

### Concentrations and Profiles of Urinary Polycyclic Aromatic Hydrocarbon

### Metabolites (OH-PAHs) in Several Asian Countries

**Ying Guo<sup>a</sup>, Kurunthachalam Senthilkumar<sup>b</sup>, Husam Alomirah<sup>c</sup>, Hyo-Bang Moon<sup>d</sup>, Tu Binh Minh<sup>e</sup>, Mustafa Ali Mohd<sup>f</sup>, Haruhiko Nakata<sup>g</sup>, and Kurunthachalam Kannan<sup>a, h, \*</sup>**

<sup>a</sup>Wadsworth Center, New York State Department of Health, and Department of Environmental Health Sciences, School of Public Health, State University of New York at Albany, Empire State Plaza, P.O. Box 509, Albany, New York 12201-0509, United States

<sup>b</sup>Department of Natural Sciences, Savannah State University, Savannah, Georgia 31404, United States

<sup>c</sup>Biotechnology Department, Kuwait Institute for Scientific Research, P.O. Box 24885, 13109 Safat, Kuwait

<sup>d</sup>Department of Marine Science and Convergence Technology, College of Science and Technology, Hanyang University, Ansan 426-791, South Korea

<sup>e</sup>UNIDO BAT/BEP Project Office, Pollution Control Department, Vietnam Environment Administration, Ba Dinh, Hanoi, Vietnam

<sup>f</sup>Faculty of Medicine, University of Malaya, Kuala Lumpur, Malaysia

<sup>g</sup>Graduate School of Science & Technology, Kumamoto University, 2-39-1 Kurokami, Kumamoto 860-8555, Japan

<sup>h</sup>International Joint Research Center for Persistent Toxic Substances, State Key Laboratory of Urban Water Resource and Environment, Harbin Institute of Technology, Harbin 150090, China

\*Corresponding author: K. Kannan  
Wadsworth Center  
Empire State Plaza, P.O. Box 509  
Albany, NY 12201-0509  
Tel: 1-518-474-0015  
Fax: 1-518-473-2895

39 E-mail: [kkannan@wadsworth.org](mailto:kkannan@wadsworth.org)  
40  
41 For submission to: Environmental Science and Technology  
42

43 **NO. OF PAGES:** 10

44 **NO. OF TABLES:** 2

45 **NO. OF FIGURES:** 3

46

47

## Sample Pretreatment

- (1) Urine samples are removed from the freezer ( $-80^{\circ}\text{C}$ ) and thawed in a  $4^{\circ}\text{C}$  dark room overnight;
- (2) At room temperature, urine samples are Vortex mixed for 30 seconds, and 2 mL of urine is transferred into a 15 mL glass tube using ejector variable volume micropipettor;
- (3) Analytical standards are removed from the refrigerator and brought to room temperature. 80  $\mu\text{L}$  of internal standards (16 ng for 1-NAP and 2-NAP, and 4 ng for others), 1 mL of ammonium acetate buffer (1 M,  $\text{pH}=5.5$ ), and 50  $\mu\text{L}$  of  $\beta$ -glucuronidase (200 units/mL) are added;
- (4) Samples are gently mixed and then incubated overnight at  $37^{\circ}\text{C}$  ( $\sim 16$  h);
- (5) Urine samples are diluted with 2 mL water; and then extracted with 5 mL organic solvent (80% pentane:20% toluene, v:v) by shaking 30 min;
- (7) After centrifugation at  $3600 \times g$  for 20 min, the up layer is transferred into a 15 mL glass tube;
- (8) Repeat the liquid-liquid extraction procedure one more time;
- (9) The combined extraction is further purified with 1 mL  $\text{AgNO}_3$  solution (1 M) by shaking 15 min. The solution is centrifuged 10 min at  $3600 \times g$  and the up layer is transferred into a 15 mL glass tube;
- (10) The collected fraction is concentrated under a gentle stream of nitrogen (first at  $30^{\circ}\text{C}$  and then at  $45^{\circ}\text{C}$ ). The final solution is diluted to 0.4 mL by methanol for instrumental analysis.

## Instrumental Analysis

An AB-Sciex 5500 triple quadrupole mass spectrometer (ESI-MS-MS; Applied Biosystems, Foster City, CA), equipped with an Agilent 1100 Series HPLC system (Agilent Technologies Inc., Santa Clara, CA), was used for analysis.

- Chromatographic separation is achieved using a Agilent Eclipse Plus C18 column (100 mm × 4.6 mm, 3.5 µm);
- The mobile phases are methanol (A) and methanol-water solution (2:3, v:v) (B) of 350 µL/min. The mobile phase gradient is as follows: 0.0-2.0 min, 95% B; 5.0-15 min, 45% B; 16.0-19.0 min, 20% B; 25.0-32.0 min, 95% B.
- The injection volume is 10 µL.
- Nitrogen is used as both curtain and collision gas.
- Target compounds are determined by multiple reaction monitoring (MRM) in the negative ionization mode.
- MS/MS parameters have been optimized for each target compound, by infusion of 20 ng/mL standard solution.
- The interface heater temperature is 500 °C and the IonSpray Voltage is -4500.

d<sub>7</sub>-1-NAP and d<sub>7</sub>-2-NAP were used as internal standards for quantification of 1-NAP and 2-NAP, <sup>13</sup>C-1-PYR, <sup>13</sup>C-6-CHRY, <sup>13</sup>C-3-BCP and <sup>13</sup>C-1-BAA are used as internal standards for quantification of 2-FLUO, 1-PYR, 1-CHRY and 6-CHRY, 3-BCP and 1-BAA, and <sup>13</sup>C-3-PHEN are used as internal standards for 2-FLUO, 2-PHEN, 3-PHEN, 4-PHEN and 9-PHEN, respectively.

The limit of quantification (LOQ) is determined based on the linear range of the calibration curve prepared at the concentration range of 0.025 to 20 ng/mL. Concentrations in samples which are at least the same as the lowest acceptable standard concentration are considered to be

94 valid. The LOQ (2 mL sample taken for extraction and 0.4 mL taken for instrumental analysis)

95 was 40 pg/mL for 1-NAP and 2-NAP and 10 pg/mL for other compounds.

96 The entire system from sample injection to data acquisition is computer-controlled with

97 Analyst 1.5 software Components for AB Sciex triple quad<sup>tm</sup> 5500 system.

98

99

|     |                                                                                                                                                |                |                         |                    |                |
|-----|------------------------------------------------------------------------------------------------------------------------------------------------|----------------|-------------------------|--------------------|----------------|
| 100 | <b>TABLE S1. Characters of Urine Samples from Asian Countries</b>                                                                              |                |                         |                    |                |
| 101 |                                                                                                                                                | <b>Age ≤10</b> | <b>10 &lt; Age ≤ 40</b> | <b>Age &gt; 40</b> | <b>Average</b> |
| 102 | China (40/44) <sup>a</sup>                                                                                                                     | 3/5            | 27/30                   | 10/9               | 29±16          |
| 103 | India (21/17) <sup>b</sup>                                                                                                                     | 0/-            | 12/10                   | 9/4                | 37±17          |
| 104 | Japan (7/27)                                                                                                                                   | 0/1            | 7/20                    | 0/6                | 32±10          |
| 105 | Korea (18/22) <sup>c</sup>                                                                                                                     | 0/0            | 12/18                   | 6/4                | 35 ±11         |
| 106 | Kuwait (15/23)                                                                                                                                 | 3/3            | 4/10                    | 8/10               | 37±21          |
| 107 | Malaysia (19/10)                                                                                                                               | 0/0            | 16/8                    | 3/2                | 30±9           |
| 108 | Vietnam (13/10)                                                                                                                                | 0/0            | 2/5                     | 11/5               | 51±19          |
| 109 | <sup>a</sup> (female/male); <sup>b</sup> ages of three samples from India are not clear; <sup>c</sup> information of 20 samples from Korea are |                |                         |                    |                |
| 110 | not available                                                                                                                                  |                |                         |                    |                |

**TABLE S2. The Results of Quality Assurance/Quality Control System (average values)**

| <b>Compound</b>         | <b>Method blank<br/>(n=10)</b> | <b>Blank spiked<br/>(n=8)</b> | <b>Matrix spiked<br/>(n=8)</b> | <b>Matrix Duplicate<br/>(n=8)</b> | <b>sample<br/>(n=308)</b> |
|-------------------------|--------------------------------|-------------------------------|--------------------------------|-----------------------------------|---------------------------|
| d7-1-NAP                | 40%                            | 43%                           | 37%                            | 37%                               | 34%                       |
| d7-2-NAP                | 26%                            | 26%                           | 38%                            | 39%                               | 32%                       |
| C <sup>13</sup> -3-PHEN | 65%                            | 68%                           | 66%                            | 73%                               | 68%                       |
| C <sup>13</sup> -1-PYR  | 10%                            | 17%                           | 51%                            | 48%                               | 24%                       |
| C <sup>13</sup> -6-CHRY | 8%                             | 14%                           | 46%                            | 55%                               | 31%                       |
| C <sup>13</sup> -3-BCP  | 62%                            | 72%                           | 59%                            | 62%                               | 62%                       |
| C <sup>13</sup> -1-BAA  | 52%                            | 57%                           | 28%                            | 28%                               | 49%                       |
| 2-NAP                   | 0.039 ng/mL                    | 109%                          | 128%                           | 19% (CV) <sup>a</sup>             | ~                         |
| 1-NAP                   | 0.028 ng/mL                    | 105%                          | 115%                           | 21% (CV)                          | ~                         |
| 2-FLUO                  | < LOQ                          | 89%                           | 85%                            | 18% (CV)                          | ~                         |
| 2-PHEN                  | 0.010 ng/mL                    | NA <sup>b</sup>               | NA <sup>b</sup>                | 19% (CV)                          | ~                         |
| 3-PHEN                  | 0.009 ng/mL                    | 92%                           | 107%                           | 20% (CV)                          | ~                         |
| 9-PHEN                  | < LOQ                          | NA <sup>b</sup>               | NA <sup>b</sup>                | 19% (CV)                          | ~                         |
| 4-PHEN                  | < LOQ                          | 70%                           | 92%                            | 18% (CV)                          | ~                         |
| 1-PYR                   | 0.068 ng/mL                    | 92%                           | 109%                           | 22% (CV)                          | ~                         |
| 1-CHRY                  | 0.159 ng/mL                    | 79%                           | 137%                           | < LOQ                             | ~                         |
| 3-BCP                   | < LOQ                          | 94%                           | 98%                            | < LOQ                             | ~                         |
| 6-CHRY                  | 0.045 ng/mL                    | 69%                           | 108%                           | < LOQ                             | ~                         |
| 1-BAA                   | 0.021 ng/mL                    | 87%                           | 89%                            | < LOQ                             | ~                         |

<sup>a</sup> CV = coefficient variation<sup>b</sup> 2-PHEN and 9-PHEN were not spiked into samples.

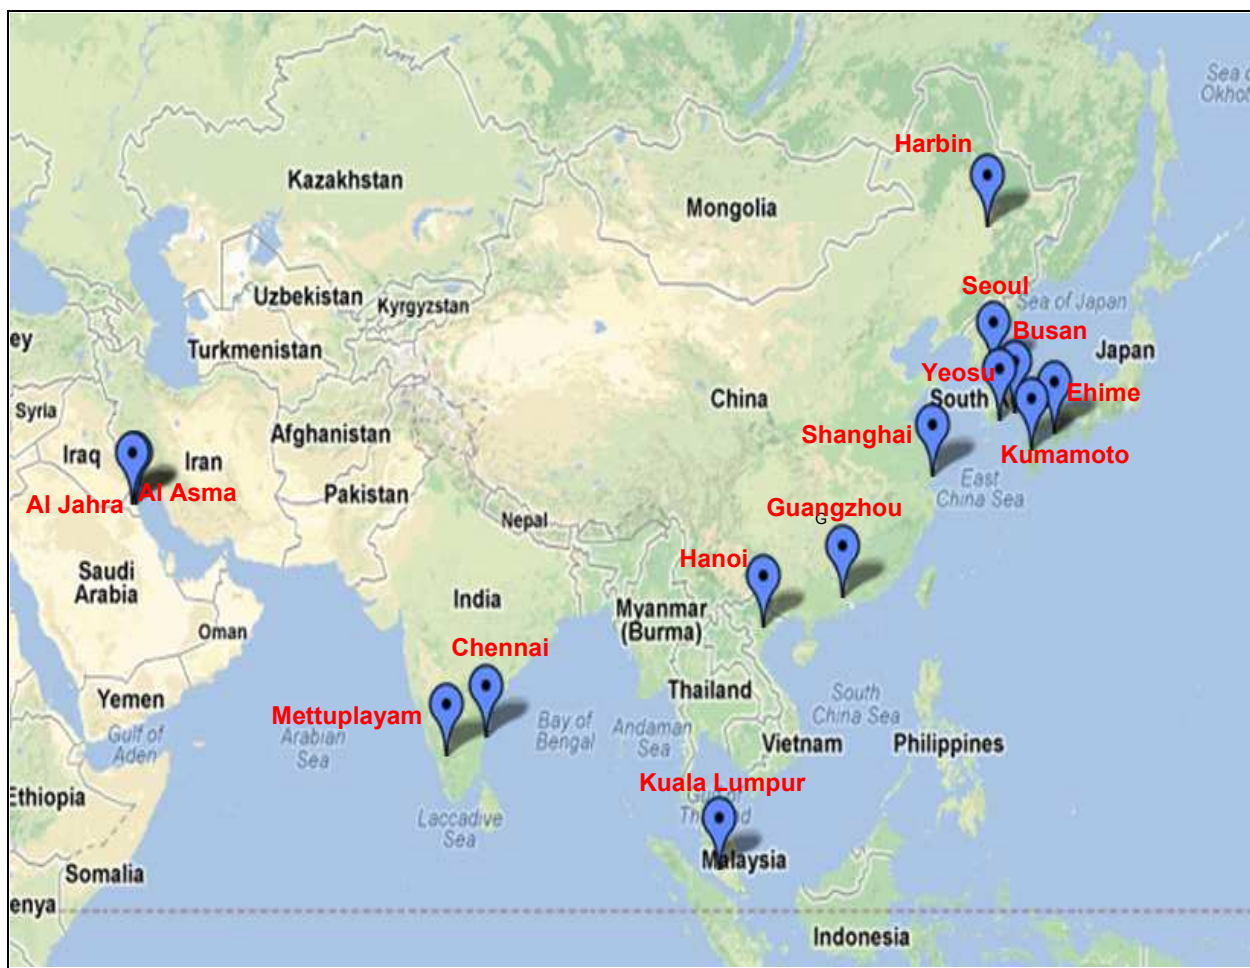

**Figure S1.** Urine sampling sites in Asian countries in the present study

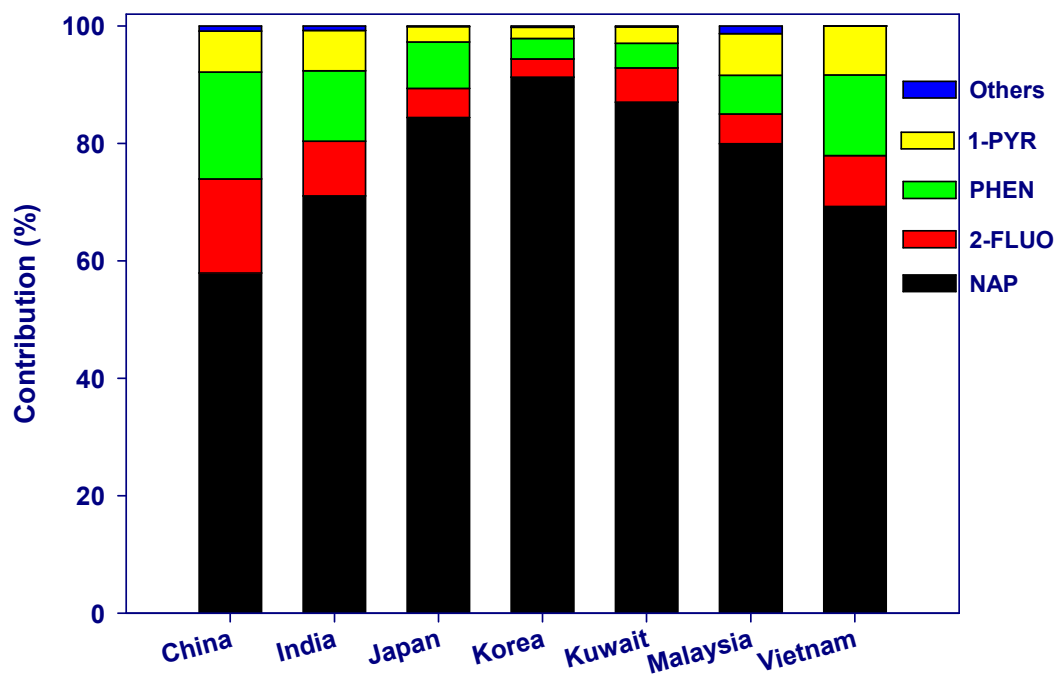

**Figure S2.** Concentration Contribution of OH-PAHs to  $\Sigma_{12}\text{OH-PAHs}$  in Asian Countries.

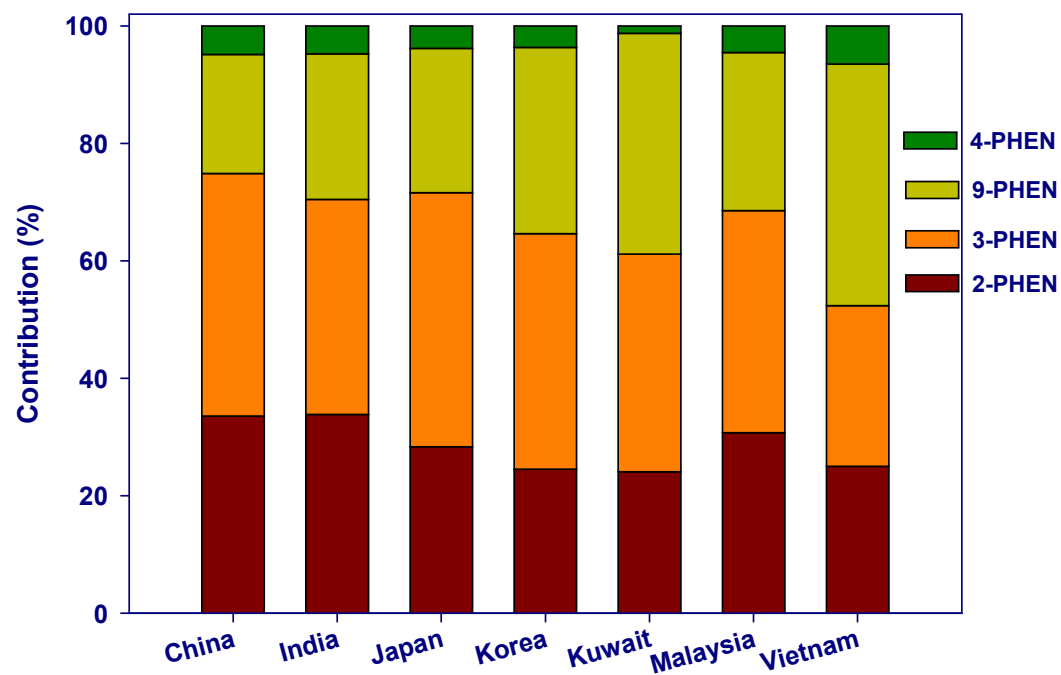

**Figure S3.** Concentration Contribution of Individual hydroxylic phenanthrene to PHEN in Asian Countries.
